# Supplementary material
Source: PubMed Central journal article supplement (PMC5401768)

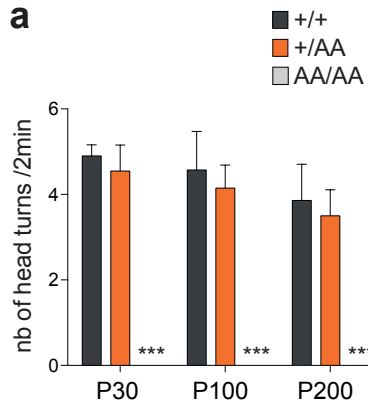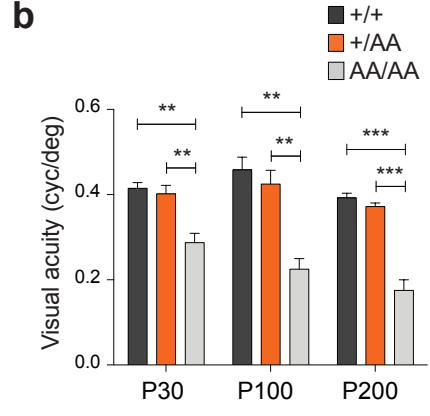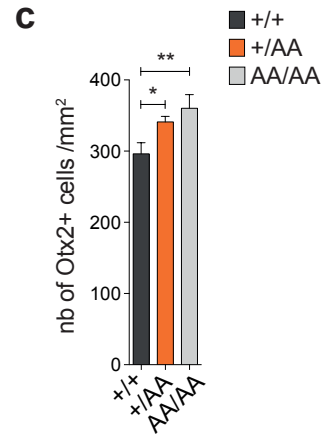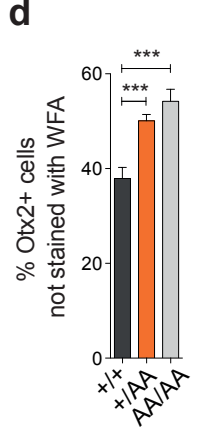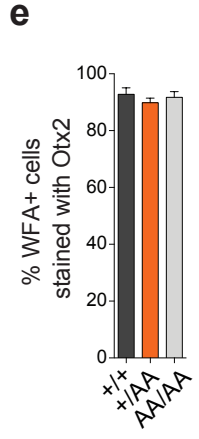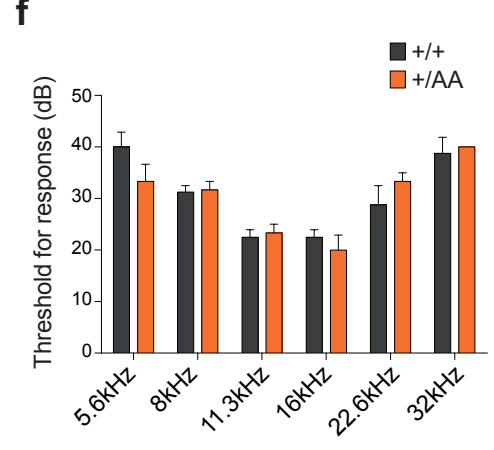

SUPPL 1

Supplement: NIHMS70887-supplement-Supplementary_Figure_S1.pdf [file NIHMS70887-supplement-Supplementary_Figure_S1.pdf]

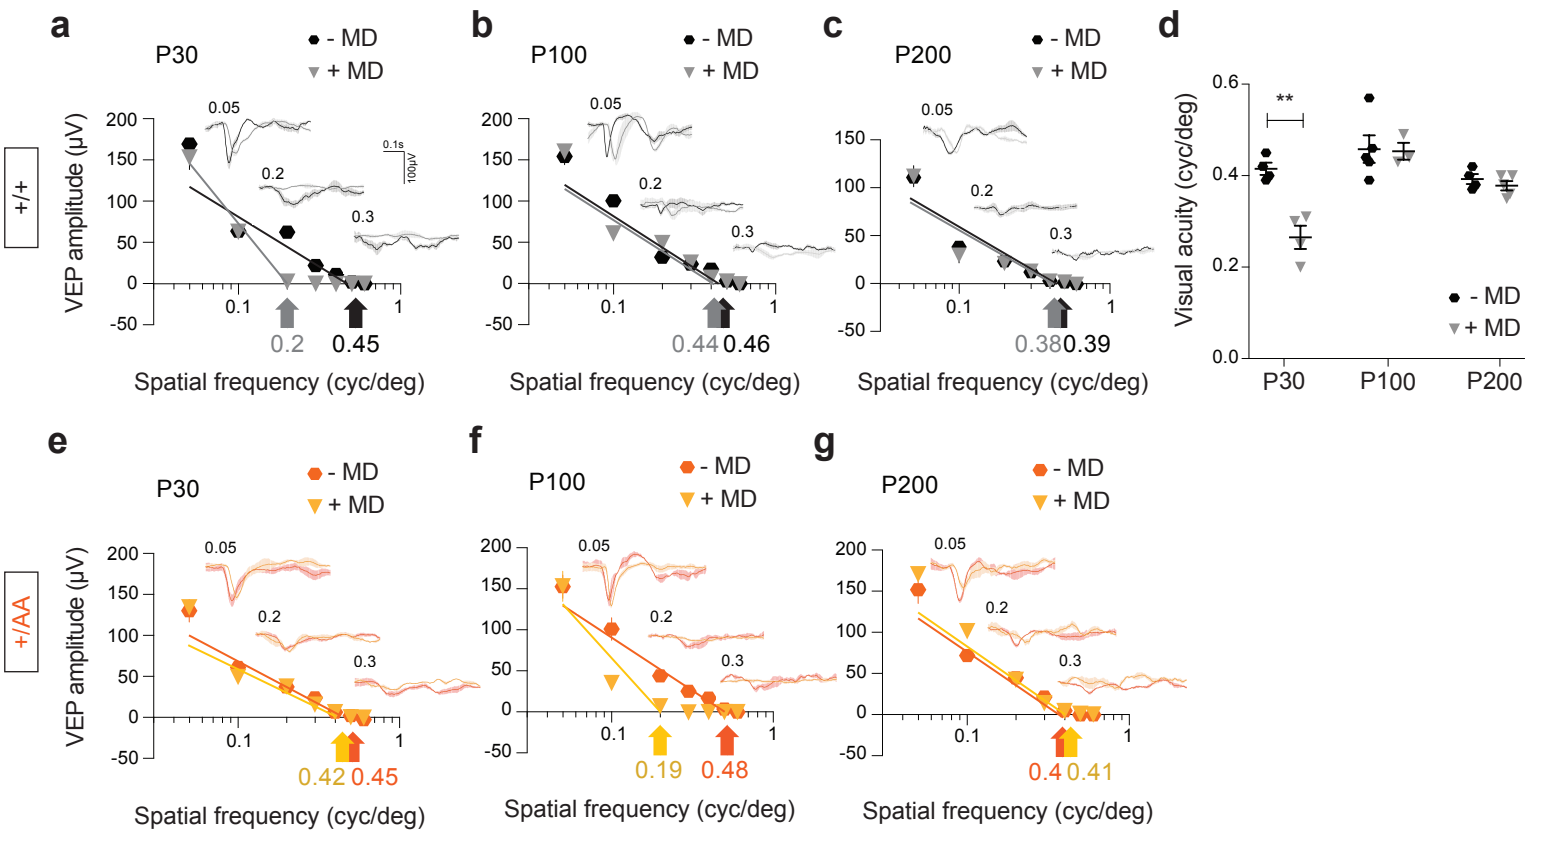

SUPPL 3

Supplement: NIHMS70887-supplement-Supplementary_Figure_S3.pdf [file NIHMS70887-supplement-Supplementary_Figure_S3.pdf]
